# Supplementary material for: Meristem Plant Cells as a Sustainable Source of Redox Actives for Skin Rejuvenation
Source: MDPI journal article supplement (doi:10.3390/biom7020040), 2017-05-12

# Medicinal plant

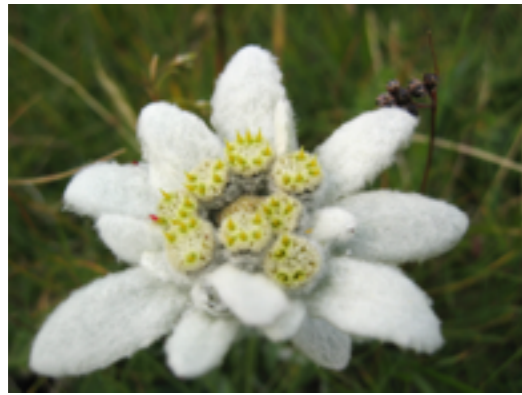

Stimulation of stem cells

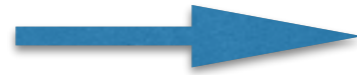

# Solid or suspended culture

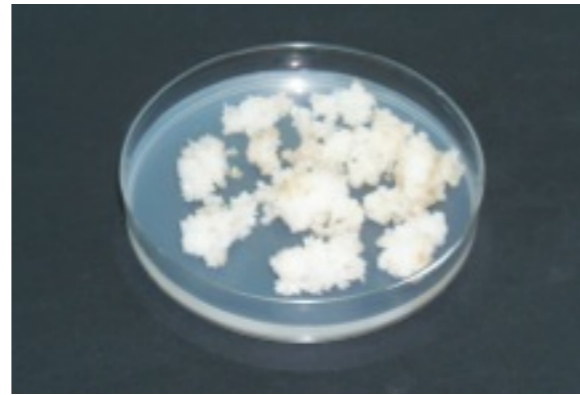

Elicitation of meristem cells for secondary metabolism

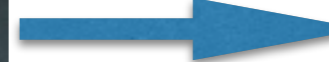

# Concentrated secondary metabolites

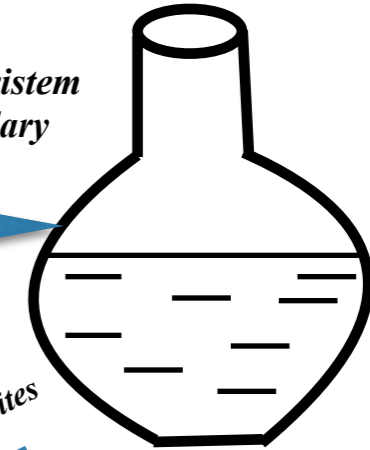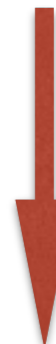

# Rejuvenation cosmetics

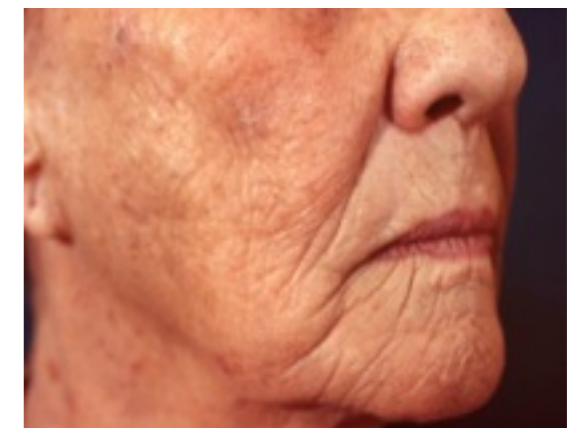

# Skin biopsy

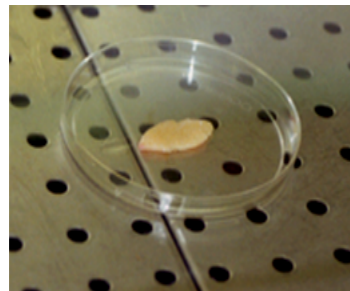

Skin cell isolation, cultivation, and challenge by:

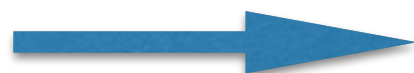

UV light, inflammatory cytokines, pro-senescence substances, environmental toxins, hormones

# Isolated skin cells

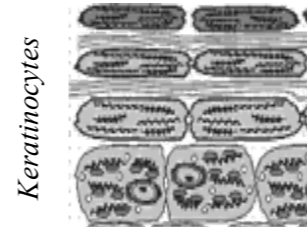

Keratinocytes

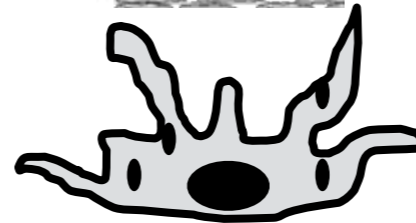

Melanocytes

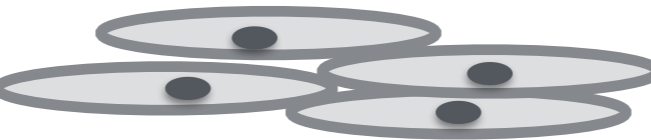

Fibroblasts

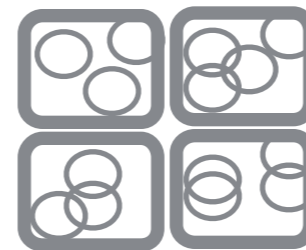

Sebocytes

Cell protection by secondary metabolites

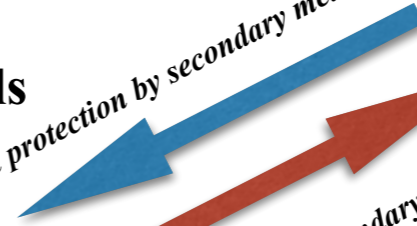

Selection of rejuvenate secondary metabolites

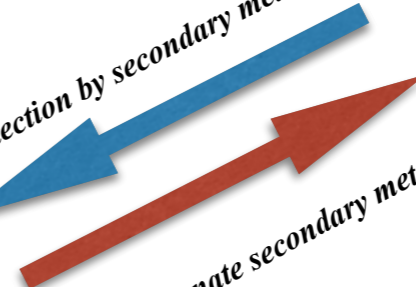

Supplement: s1 [file s1]
